# Supplementary material for: Identification of serum biomarkers for active pulmonary tuberculosis using a targeted metabolomics approach
Source: PubMed Central journal article supplement (PMC7052258; doi:10.1038/s41598-020-60669-0), 2020-03-02

1 **Identification of serum biomarkers for active pulmonary tuberculosis using a targeted**  
2 **metabolomics approach**

3

4 Yonggeun Cho<sup>1†</sup>, Youngmok Park<sup>2†</sup>, Bora Sim<sup>3,4</sup>, Jungho Kim<sup>3,4,5</sup>, Hyejon Lee<sup>3,4</sup>, Sang-Nae  
5 Cho<sup>3,4</sup>, Young Ae Kang<sup>2,4\*</sup>, Sang-Guk Lee<sup>1\*</sup>

6

7 <sup>1</sup>Department of Laboratory Medicine, Severance Hospital, Yonsei University College of  
8 Medicine, Seoul, Republic of Korea

9 <sup>2</sup>Division of Pulmonology, Department of Internal Medicine, Severance Hospital, Yonsei  
10 University College of Medicine, Seoul, Republic of Korea

11 <sup>3</sup>Department of Microbiology, Yonsei University College of Medicine, Seoul, Republic of  
12 Korea

13 <sup>4</sup>Institute of Immunology and Immunological Diseases, Yonsei University College of Medicine,  
14 Seoul, Republic of Korea

15 <sup>5</sup>Department of Clinical Laboratory Science, College of Health Sciences, Catholic University  
16 of Pusan, Busan, Republic of Korea

17

18 **SUPPLEMENTARY TABLES**

19

20 **Supplementary Table S1.** List of the metabolites belonging to the significant area on the  
 21 volcano plot of the 180 metabolites derived from the comparison between patients with active  
 22 tuberculosis and those in the other groups (i.e., patients with latent tuberculosis and healthy  
 23 controls).

| <b>Analyte</b>                       | <b>Fold change</b> | <b>FDR adjusted<br/>P-value<sup>a</sup></b> | <b>AUC [95% CI]<sup>b</sup></b> |
|--------------------------------------|--------------------|---------------------------------------------|---------------------------------|
| Glutamine                            | 0.2782             | 6.6708.E-18                                 | 1.0000 [NA]                     |
| Phosphatidylcholine diacyl C38:6     | 0.3101             | 2.3108.E-15                                 | 0.9871 [0.9633-1.0000]          |
| Methionine                           | 0.2066             | 1.0609.E-14                                 | 0.9916 [0.9717-1.0000]          |
| Phosphatidylcholine diacyl C38:5     | 0.3844             | 6.0894.E-14                                 | 0.9802 [0.9325-1.0000]          |
| Phosphatidylcholine diacyl C36:4     | 0.4917             | 5.3205.E-13                                 | 0.9861 [0.9583-1.0000]          |
| Phosphatidylcholine diacyl C40:6     | 0.3527             | 2.6854.E-12                                 | 0.9643 [0.9147-0.9970]          |
| Phosphatidylcholine acyl-alkyl C38:6 | 0.4114             | 9.7688.E-12                                 | 0.9544 [0.9018-0.9881]          |
| Phosphatidylcholine acyl-alkyl C40:3 | 13.6965            | 6.6526.E-11                                 | 1.0000 [NA]                     |
| Phosphatidylcholine acyl-alkyl C38:3 | 8.0093             | 1.5535.E-10                                 | 1.0000 [NA]                     |
| Phosphatidylcholine diacyl C38:4     | 0.5336             | 2.9400.E-10                                 | 0.9583 [0.9087-0.9921]          |
| Glutamate                            | 3.6960             | 5.8219.E-10                                 | 0.9980 [0.9901-1.0000]          |
| Phosphatidylcholine acyl-alkyl C40:4 | 4.2297             | 1.8340.E-09                                 | 1.0000 [NA]                     |
| Aspartate                            | 2.0031             | 2.7802.E-09                                 | 0.9732 [0.9365-0.996]           |
| Phosphatidylcholine acyl-alkyl C38:5 | 0.5436             | 3.2392.E-09                                 | 0.9315 [0.869-0.9802]           |
| Phosphatidylcholine acyl-alkyl C38:1 | 26.5236            | 3.5483.E-09                                 | 1.0000 [NA]                     |
| Phosphatidylcholine acyl-alkyl C36:5 | 0.5201             | 8.7250.E-09                                 | 0.9177 [0.8413-0.9722]          |
| Phosphatidylcholine acyl-alkyl C36:1 | 7.0018             | 1.1227.E-08                                 | 1.0000 [NA]                     |

|                                      |         |             |                        |
|--------------------------------------|---------|-------------|------------------------|
| Phosphatidylcholine diacyl C26:0     | 2.1633  | 1.2126.E-08 | 0.9990 [0.994-1.0000]  |
| Phosphatidylcholine diacyl C24:0     | 5.1939  | 1.2126.E-08 | 0.9990 [0.994-1.0000]  |
| Phosphatidylcholine acyl-alkyl C42:1 | 6.5630  | 1.2126.E-08 | 1.0000 [NA]            |
| Phosphatidylcholine acyl-alkyl C38:2 | 10.3047 | 1.2126.E-08 | 1.0000 [NA]            |
| Phosphatidylcholine diacyl C34:4     | 0.5827  | 1.4150.E-08 | 0.8958 [0.8046-0.9643] |
| Phosphatidylcholine acyl-alkyl C30:2 | 5.8348  | 1.5119.E-08 | 1.0000 [NA]            |
| Phosphatidylcholine diacyl C40:2     | 14.7802 | 1.5119.E-08 | 1.0000 [NA]            |
| Phosphatidylcholine acyl-alkyl C40:5 | 4.4096  | 1.5718.E-08 | 0.9990 [0.9940-1.0000] |
| Asparagine                           | 0.6585  | 2.0553.E-08 | 0.9325 [0.8631-0.9851] |
| Phosphatidylcholine acyl-alkyl C42:4 | 3.0855  | 2.2094.E-08 | 0.9911 [0.9683-1.0000] |
| Phosphatidylcholine diacyl C38:1     | 4.9007  | 2.2094.E-08 | 1.0000 [NA]            |
| Phosphatidylcholine diacyl C40:5     | 0.5454  | 2.3281.E-08 | 0.9137 [0.8294-0.9802] |
| Phosphatidylcholine acyl-alkyl C40:2 | 4.5435  | 2.4123.E-08 | 1.0000 [NA]            |
| Phosphatidylcholine diacyl C36:5     | 0.3238  | 2.5518.E-08 | 0.9395 [0.8810-0.9861] |
| lysoPhosphatidylcholine acyl C26:0   | 6.4653  | 2.5672.E-08 | 1.0000 [NA]            |
| Phosphatidylcholine diacyl C42:4     | 11.9750 | 4.5463.E-08 | 1.0000 [NA]            |
| Serotonin                            | 0.5727  | 5.1076.E-08 | 0.8710 [0.7807-0.9420] |
| lysoPhosphatidylcholine acyl C24:0   | 3.7131  | 5.1076.E-08 | 0.9990 [0.9940-1.0000] |
| Phosphatidylcholine diacyl C42:2     | 5.0329  | 5.1076.E-08 | 1.0000 [NA]            |
| Acetyl-L-carnitine                   | 0.4849  | 5.3150.E-08 | 0.8998 [0.8085-0.9702] |
| lysoPhosphatidylcholine acyl C28:0   | 4.9381  | 5.6937.E-08 | 1.0000 [NA]            |
| Methionine sulfoxide                 | 14.8313 | 6.4080.E-08 | 1.0000 [NA]            |
| Phosphatidylcholine diacyl C36:3     | 0.6959  | 7.7201.E-08 | 0.8998 [0.8135-0.9692] |
| lysoPhosphatidylcholine acyl C28:1   | 4.0044  | 7.7201.E-08 | 1.0000 [NA]            |
| lysoPhosphatidylcholine acyl C26:1   | 6.3098  | 7.7201.E-08 | 1.0000 [NA]            |

|                                      |        |             |                        |
|--------------------------------------|--------|-------------|------------------------|
| Phosphatidylcholine diacyl C42:5     | 3.3058 | 7.9581.E-08 | 0.9980 [0.9911-1.0000] |
| Phosphatidylcholine acyl-alkyl C42:3 | 4.3210 | 8.4480.E-08 | 1.0000 [NA]            |
| Phosphatidylcholine acyl-alkyl C42:2 | 3.9342 | 8.6238.E-08 | 1.0000 [NA]            |
| Phosphatidylcholine diacyl C42:0     | 2.2734 | 1.0864.E-07 | 0.9851 [0.9613-1.0000] |
| Phosphatidylcholine acyl-alkyl C42:5 | 3.0749 | 1.0864.E-07 | 1.0000 [NA]            |
| Phosphatidylcholine diacyl C40:3     | 8.2331 | 1.3747.E-07 | 1.0000 [NA]            |
| Phosphatidylcholine diacyl C42:1     | 3.1572 | 1.6326.E-07 | 0.9990 [0.9940-1.0000] |
| Phosphatidylcholine diacyl C36:0     | 2.2926 | 2.0462.E-07 | 0.9633 [0.9177-0.9921] |
| Phosphatidylcholine acyl-alkyl C40:1 | 2.6852 | 2.0462.E-07 | 1.0000 [NA]            |
| Phosphatidylcholine acyl-alkyl C44:3 | 6.6269 | 2.0462.E-07 | 1.0000 [NA]            |
| Phosphatidylcholine diacyl C40:1     | 4.1661 | 3.9455.E-07 | 1.0000 [NA]            |
| Phosphatidylcholine acyl-alkyl C44:4 | 2.3703 | 4.1959.E-07 | 0.9980 [0.9911-1.0000] |
| Phosphatidylcholine acyl-alkyl C30:1 | 2.5463 | 4.2635.E-07 | 0.9356 [0.8701-0.9816] |
| Phosphatidylcholine acyl-alkyl C36:4 | 0.6188 | 5.1767.E-07 | 0.8482 [0.7381-0.9365] |
| Phosphatidylcholine acyl-alkyl C42:0 | 1.8159 | 1.0670.E-06 | 0.9871 [0.9643-1.0000] |
| Butyryl-L-carnitine                  | 0.6455 | 1.8492.E-06 | 0.8447 [0.7296-0.9350] |
| Phosphatidylcholine diacyl C40:4     | 2.7934 | 3.4390.E-06 | 0.9921 [0.9742-1.0000] |
| Phosphatidylcholine acyl-alkyl C36:2 | 1.6180 | 5.8268.E-06 | 0.8899 [0.8006-0.9633] |

24 <sup>a</sup> P-values were calculated using Mann-Whitney U tests.

25 <sup>b</sup> The AUCs of receiver characteristic analysis to predict patients with active tuberculosis were  
 26 presented with their 95% CI computed by 2000 stratified bootstrap replicates. For the  
 27 metabolite or ratio with the AUC value of 1, CI was not presented to avoid misunderstanding.

28 Abbreviations: FDR, false discovery rate; AUC, area under the curve; CI, confidence interval;  
 29 NA, not available

30

31 **Supplementary Table S2.** List of the metabolites belonging to the significant area on the  
 32 volcano plot of 76 non-lipid metabolites (amino acids, biogenic amines, acyl-carnitines, and  
 33 hexose) derived from the comparison between patients with active tuberculosis and those in  
 34 the other groups (i.e., patients with latent tuberculosis and healthy controls).

| <b>Analyte</b>       | <b>Fold change</b> | <b>FDR adjusted P-value<sup>a</sup></b> |
|----------------------|--------------------|-----------------------------------------|
| Glutamine            | 0.2782             | 1.2971.E-18                             |
| Methionine           | 0.2066             | 3.0942.E-15                             |
| Glutamate            | 3.6960             | 4.1508.E-10                             |
| Aspartate            | 2.0031             | 1.7569.E-09                             |
| Asparagine           | 0.6585             | 2.0781.E-08                             |
| Serotonin            | 0.5727             | 5.9589.E-08                             |
| Methionine sulfoxide | 14.8313            | 6.9420.E-08                             |
| Acetyl-L-carnitine   | 0.4849             | 1.1862.E-07                             |
| Butyryl-L-carnitine  | 0.6455             | 5.1184.E-06                             |

35 <sup>a</sup> P-values were calculated using Mann-Whitney U tests.

36 Abbreviations: FDR, false discovery rate

37

38 **SUPPLEMENTARY FIGURES AND FIGURE LEGENDS**

39

40 **Supplementary Figure S1.** Principal component analysis (PCA) score and loading plot of the  
41 metabolites measured in patients with active tuberculosis, those with latent tuberculosis, and  
42 healthy controls.

43 (A) In the score plot, each dot represents an individual and is colored in accordance with the  
44 embedded legends. (B) The loadings for the two principal components (PC1 and PC2) are  
45 depicted. The metabolites located distant from the origin are labeled with their chemical names.

46 Abbreviations: Glu, glutamate; Gln, glutamine; PC, phosphatidylcholine

47

# A

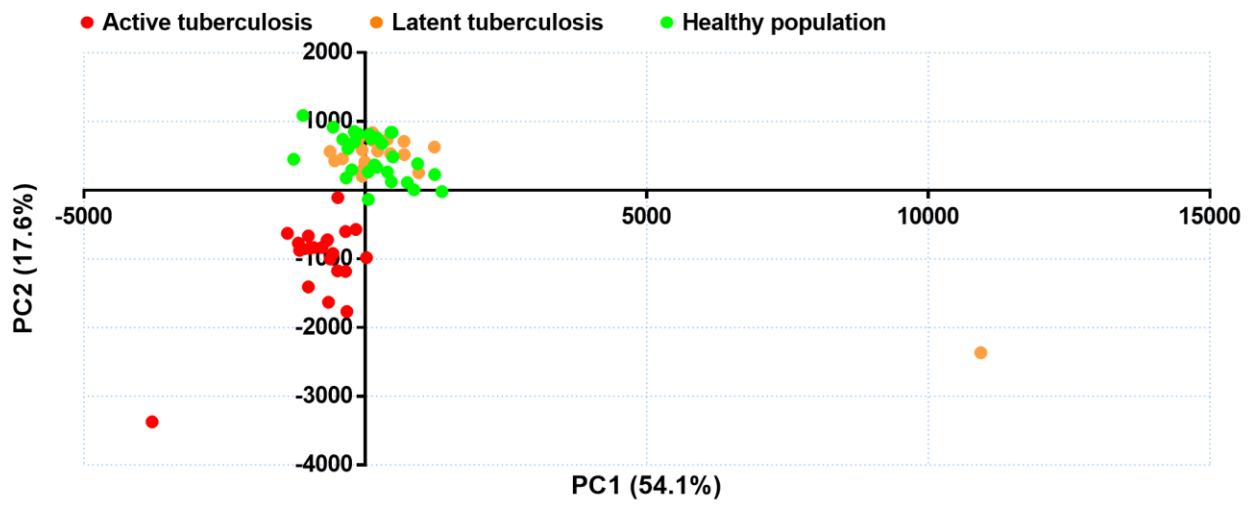

# B

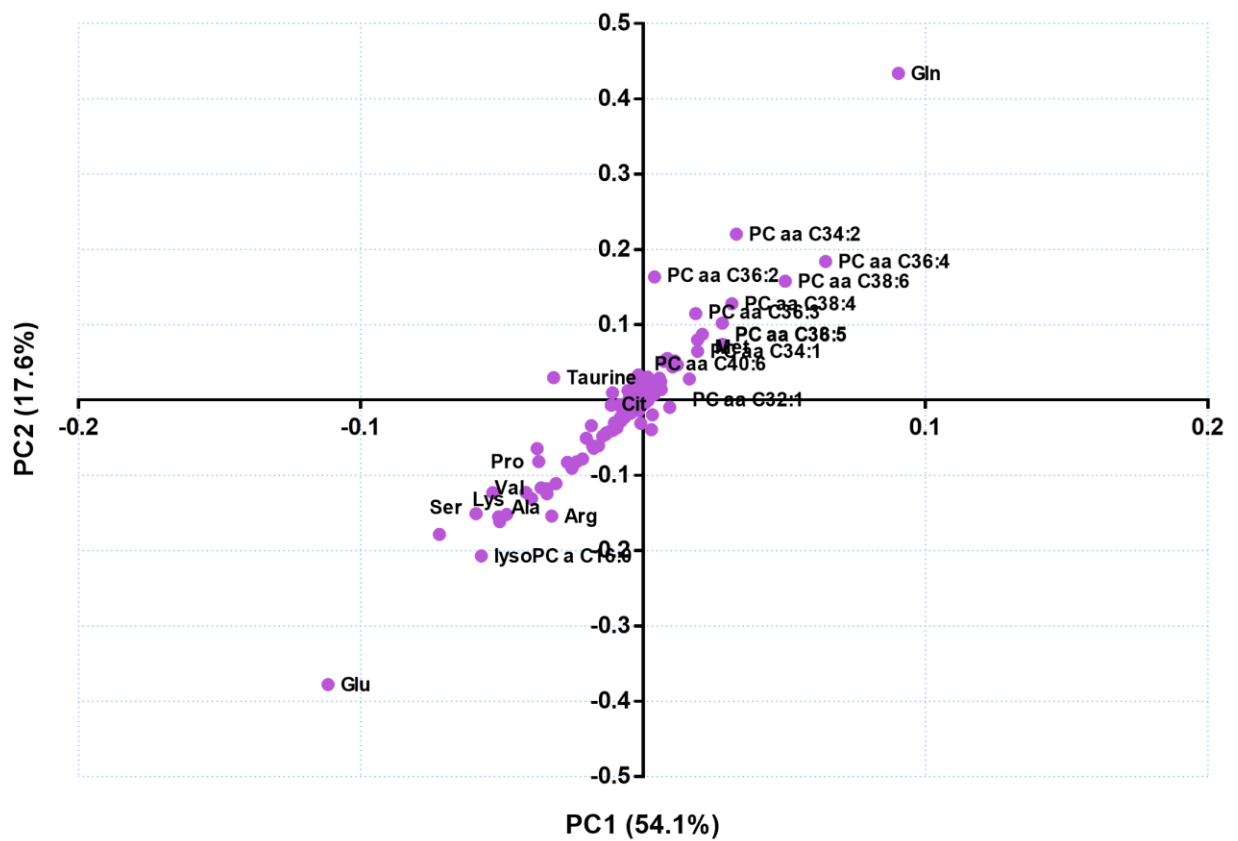

48

49

50 **Supplementary Figure S2.** Volcano plot of all 180 metabolites derived from the comparison  
51 between patients with active tuberculosis and the others (patients with latent tuberculosis and  
52 healthy population).

53 A total of 76 non-lipid metabolites (amino acids, biogenic amines, acyl-carnitines, and hexose)  
54 are shown as red dots, and the other 104 lipid metabolites (lysophosphatidylcholines,  
55 phosphatidylcholines, sphingomyelins) are shown as grey dots.

56

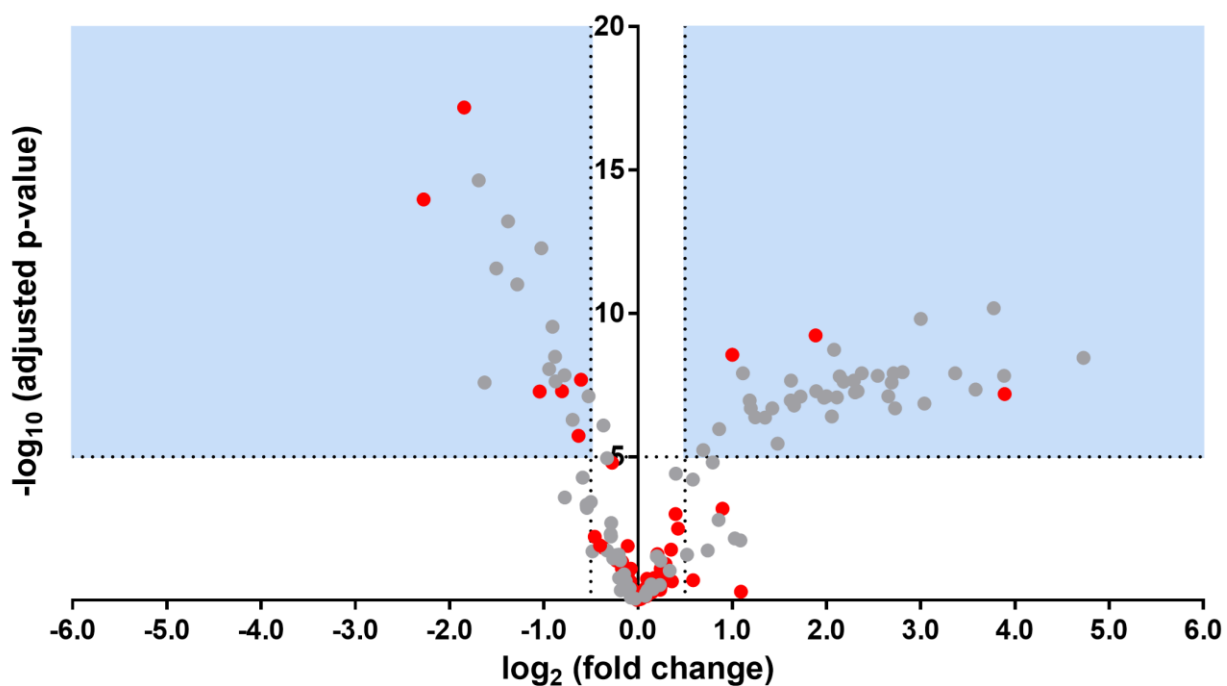

57

58



59 **Supplementary Figure S3.** The concentrations of representative lipid metabolites among  
60 study populations. The median values of metabolites were compared among the healthy  
61 population, patients with latent tuberculosis, and patients with active tuberculosis using  
62 Kruskal-Wallis tests.  
63 Abbreviations: PC, phosphatidylcholine; LysoPC, lysophosphatidylcholine; aa, diacyl; ae,  
64 acyl-alkyl; a, acyl

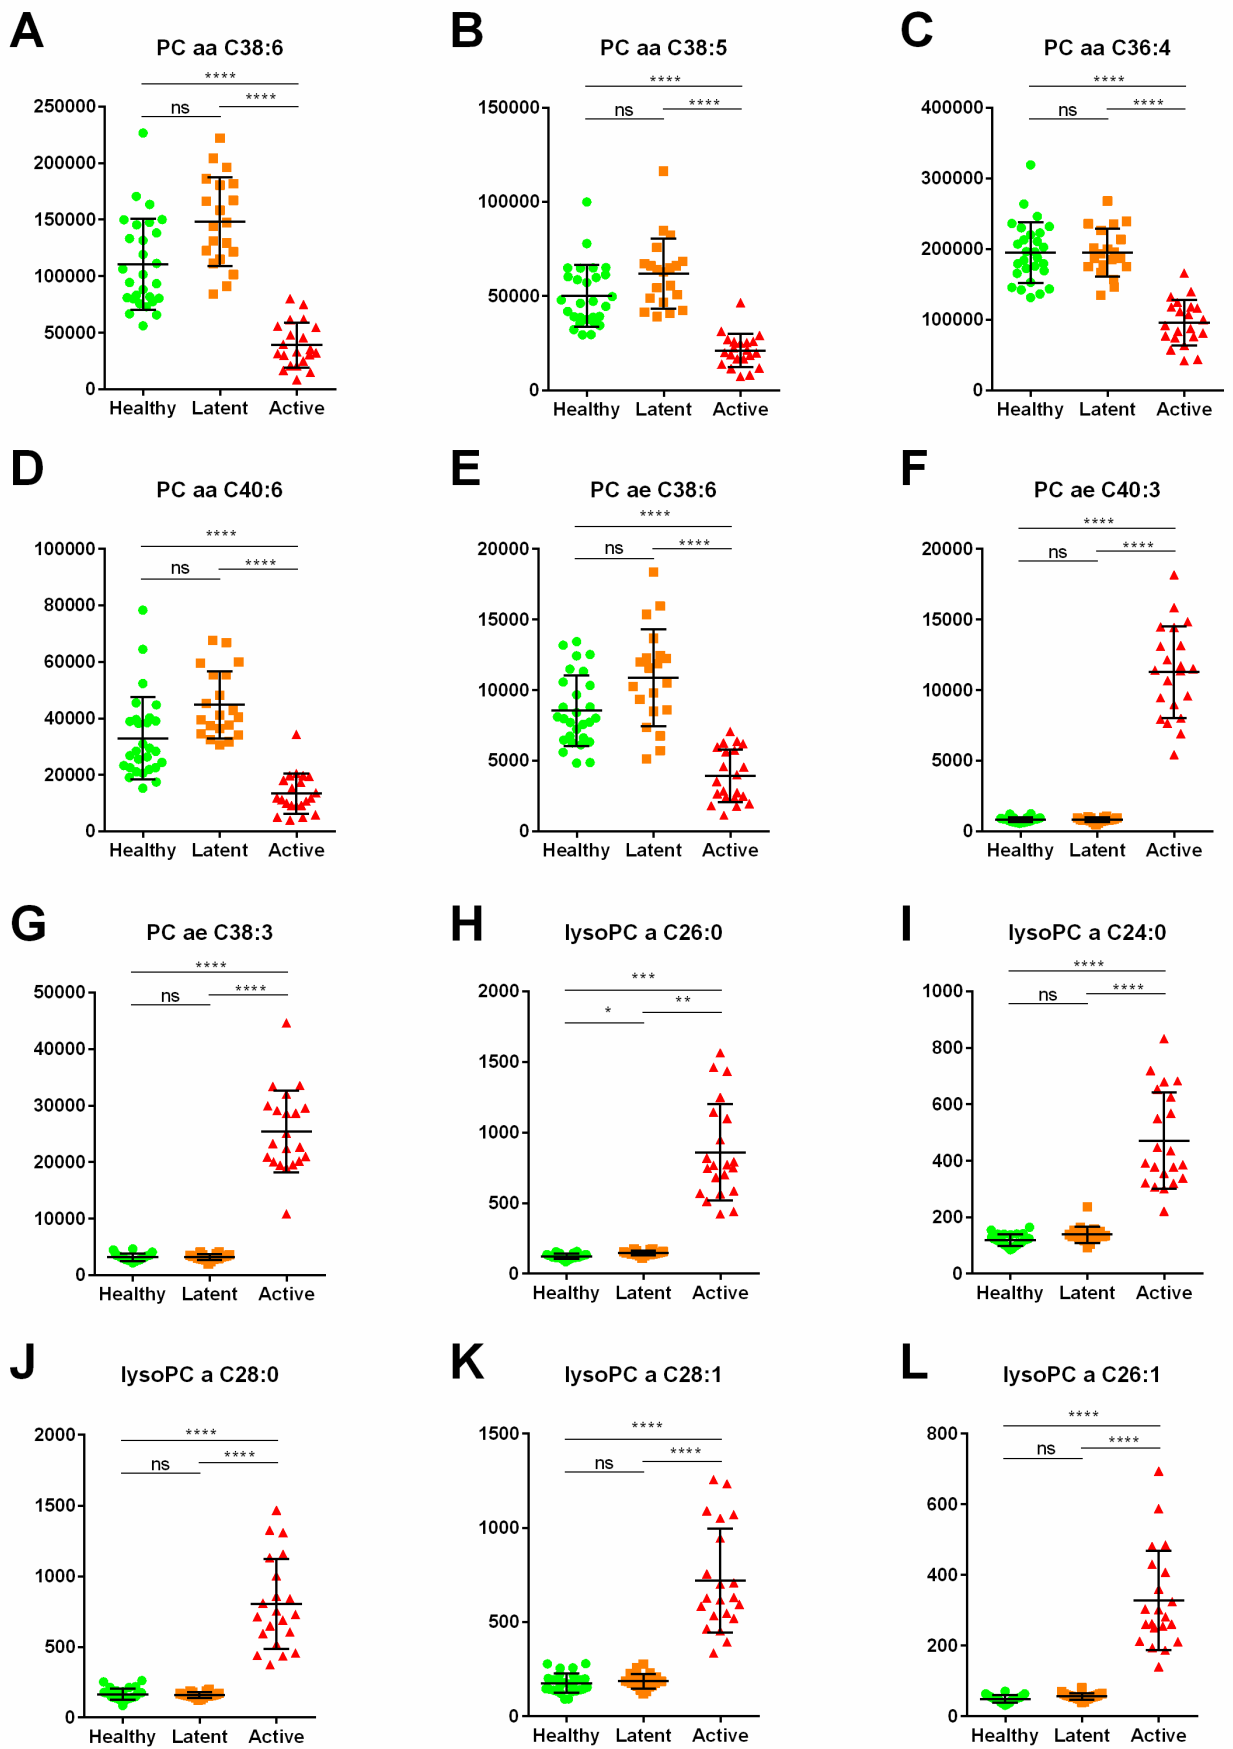

66 **Supplementary Figure S4.** ROC curves of representative lipid metabolites for the  
67 differentiation of patients with active tuberculosis from those in the other groups, including  
68 patients with latent tuberculosis infection and healthy controls.

69 Blue lines indicate ROC curves, and royal blue regions show the 95% CI of the curve computed  
70 with 2000 bootstrap replicates. The AUC, followed by its 95% CI in brackets, were also  
71 denoted over the bottom side of each figure. For the metabolite with an AUC value of 1, CI  
72 was not presented to avoid misunderstanding.

73 Abbreviations: TPR, true positive rate; FPR, false positive rate; PC, phosphatidylcholine;  
74 LysoPC, lysophosphatidylcholine; aa, diacyl; ae, acyl-alkyl; a, acyl; NA, not available; ROC,  
75 receiver operating characteristic; CI, confidence interval; AUC, area under the curve

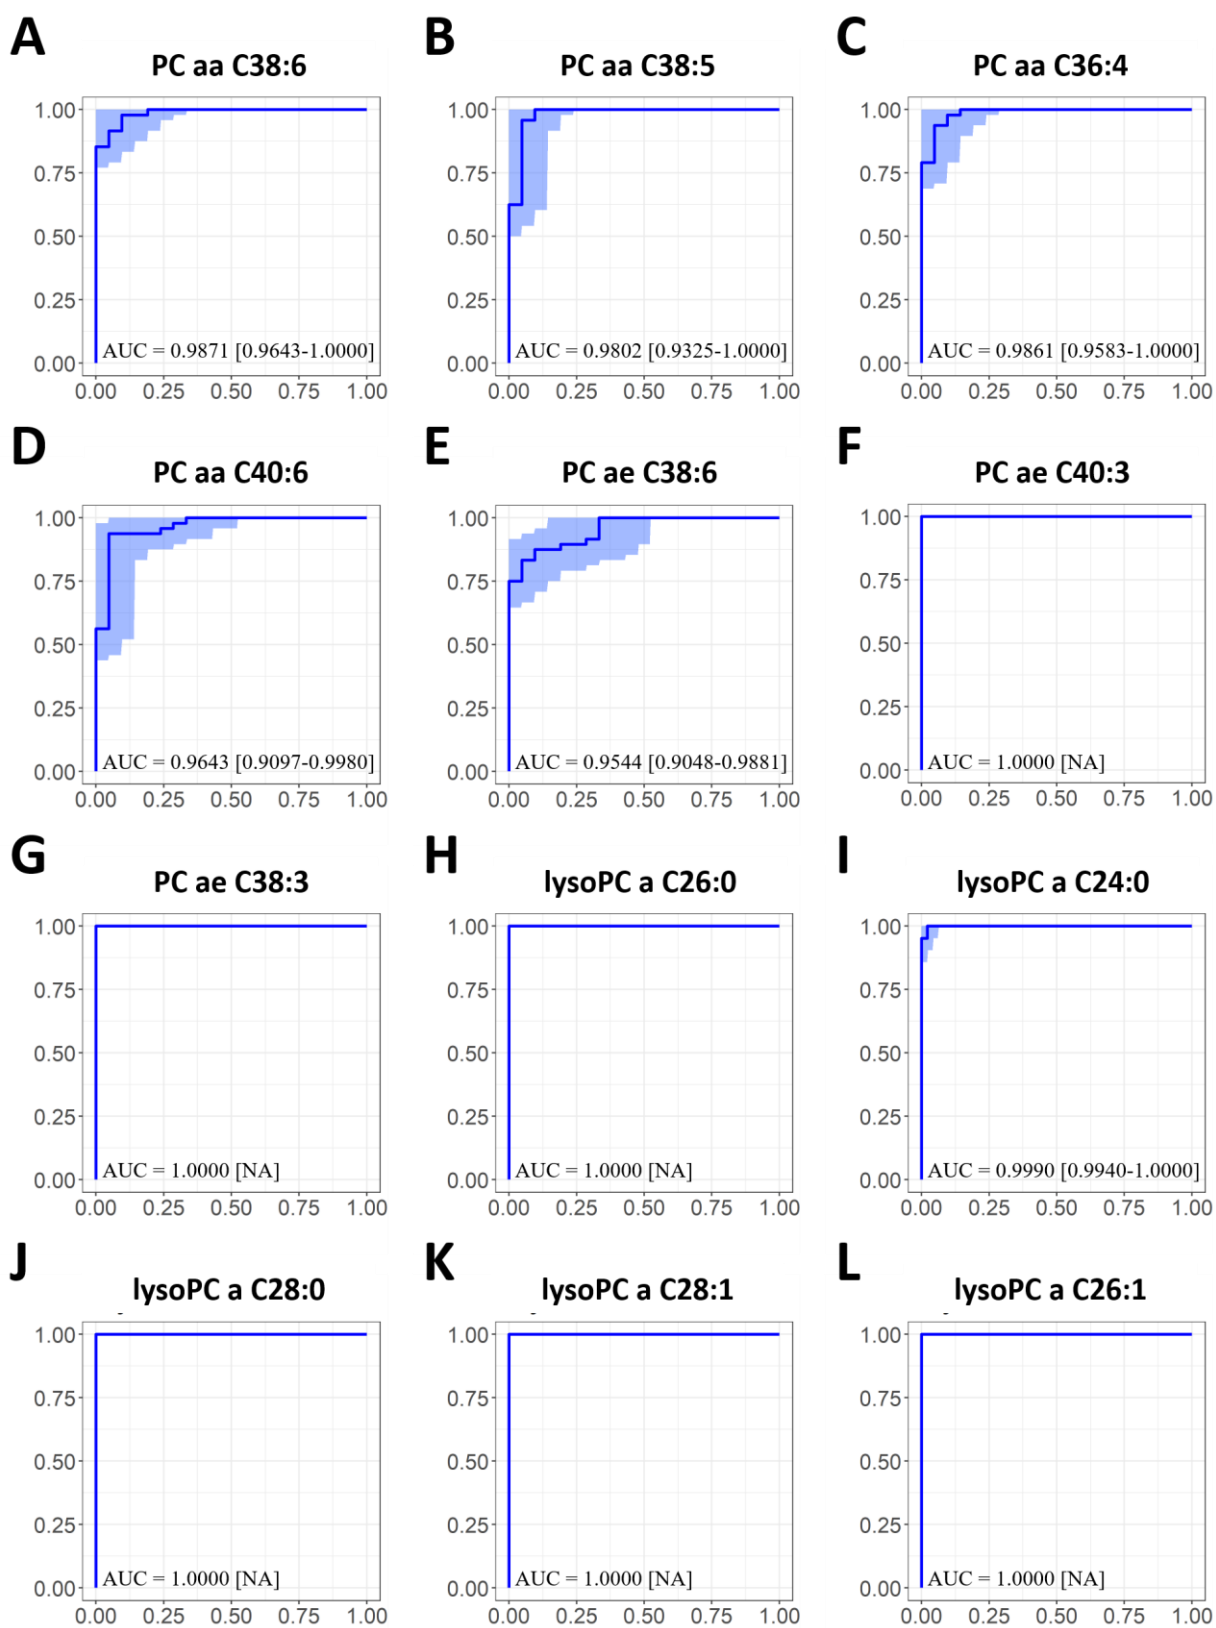

77 **Supplementary Figure S5.** The levels or ratios of selected metabolites among patients with  
78 active tuberculosis harboring different risks.

79 The patients with active tuberculosis on into two subgroups according to their degree of risk  
80 burden (low or mid/high). The concentrations of selected metabolites and their ratios were  
81 compared using Mann-Whitney U tests. Note that the figures representing Glu/Gln and  
82 MetSO/Met ratio are on a logarithmic scale (C and F), while the others are on a linear scale.

83 Abbreviations: Glu, glutamate; Gln, glutamine; Met, methionine; MetSO, sulfoxy methionine;

84 Kyn, kynurenine; Trp, tryptophan

**A** Glutamate ( $\mu\text{mol/L}$ )

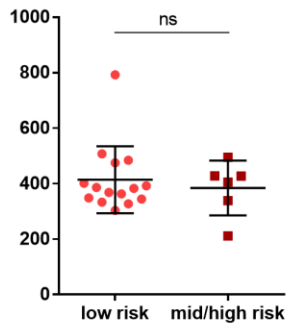

**B** Glutamine ( $\mu\text{mol/L}$ )

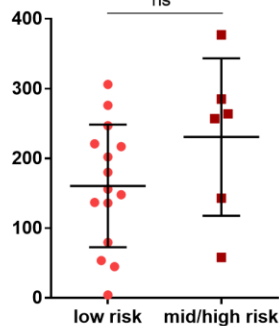

**C** Glu/Gln

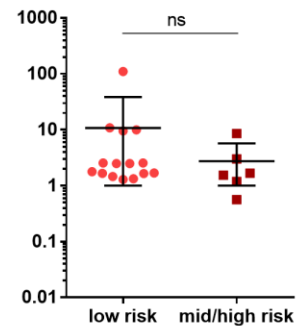

**D** Sulfoxy methionine ( $\mu\text{mol/L}$ )

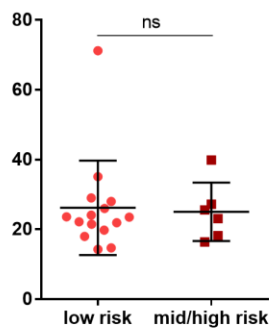

**E** Methionine ( $\mu\text{mol/L}$ )

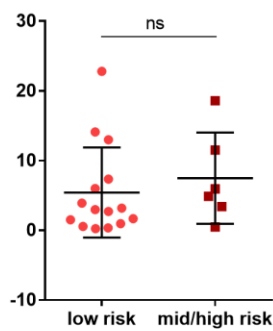

**F** MetSO/Met

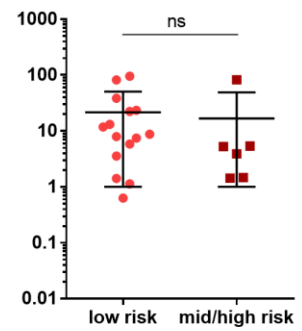

**G** Aspartate ( $\mu\text{mol/L}$ )

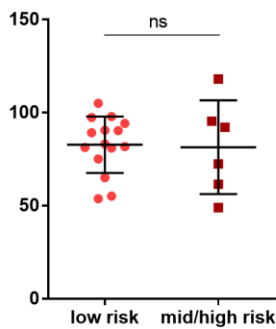

**H** Asparagine ( $\mu\text{mol/L}$ )

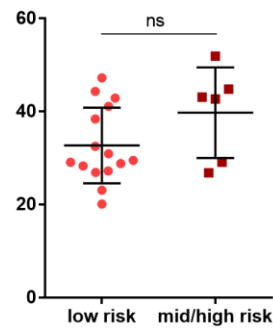

**I** Asp/Asn

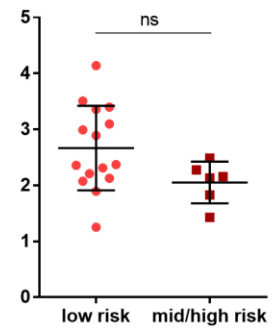

**J** Kynurenine ( $\mu\text{mol/L}$ )

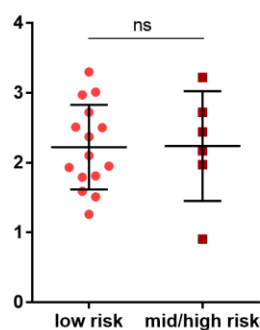

**K** Tryptophan ( $\mu\text{mol/L}$ )

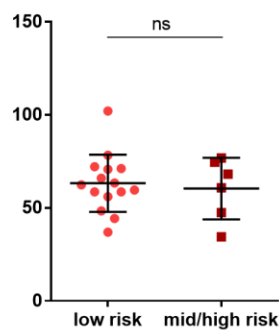

**L** Kyn/Trp

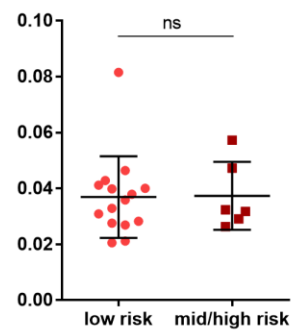

86 **Supplementary Figure S6.** The levels or ratios of selected metabolites among patients with  
87 active tuberculosis with different extents of pulmonary involvement.

88 The patients with active tuberculosis were divided into two sub-groups according to the extent  
89 of pulmonary involvement of their TB ( $< 1/3$  or  $\geq 1/3$  of the total lung area). The concentrations  
90 of selected metabolites and their ratios were compared using Mann-Whitney U tests. Note that  
91 figures representing the Glu/Gln or MetSO/Met ratio are on a logarithmic scale (C and F),  
92 while the others are on a linear scale.

93 Abbreviations: Glu, glutamate; Gln, glutamine; Met, methionine; MetSO, sulfoxy methionine;  
94 Kyn, kynurenine; Trp, tryptophan

**A** Glutamate ( $\mu\text{mol/L}$ )

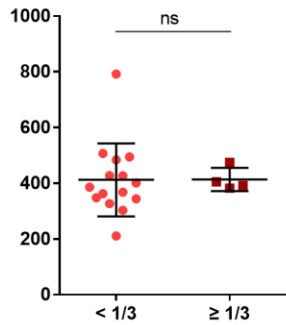

**B** Glutamine ( $\mu\text{mol/L}$ )

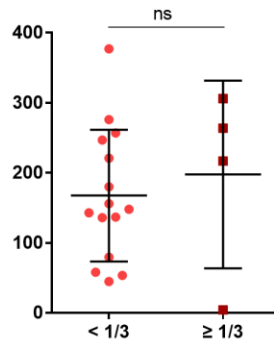

**C** Glu/Gln

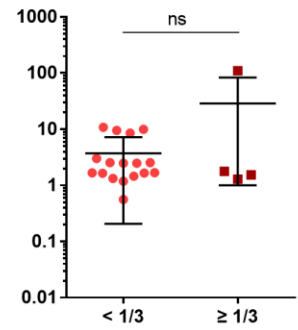

**D** Sulfoxymethionine ( $\mu\text{mol/L}$ )

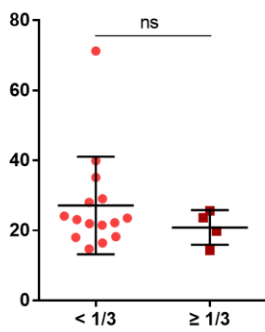

**E** Methionine ( $\mu\text{mol/L}$ )

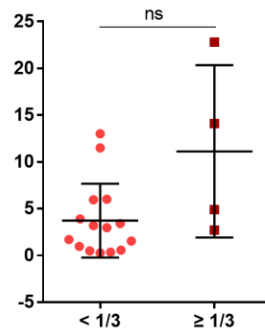

**F** MetSO/Met

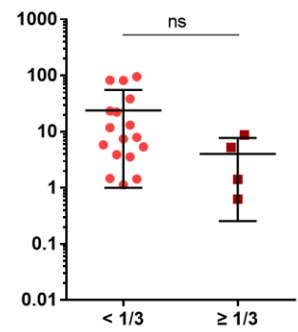

**G** Aspartate ( $\mu\text{mol/L}$ )

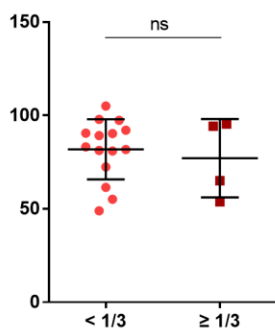

**H** Asparagine ( $\mu\text{mol/L}$ )

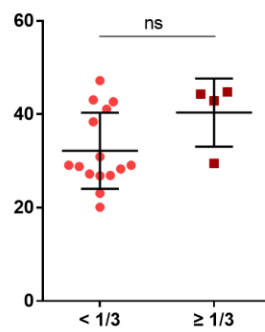

**I** Asp/Asn

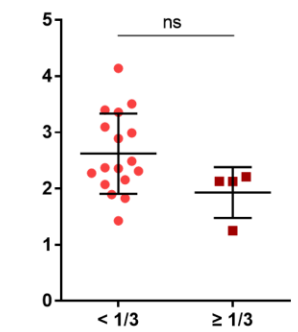

**J** Kynurenine ( $\mu\text{mol/L}$ )

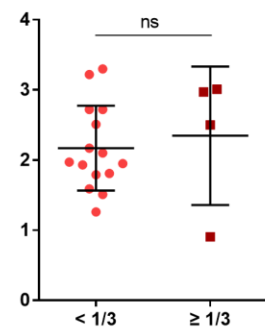

**K** Tryptophan ( $\mu\text{mol/L}$ )

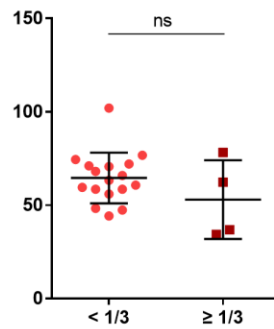

**L** Kyn/Trp

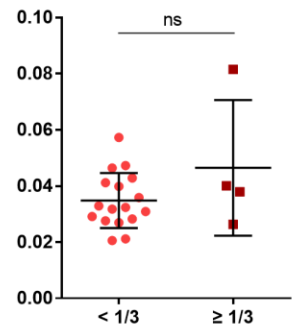



96 **Supplementary Figure S7.** The levels or ratios of selected metabolites among the study  
97 population by Wiener et al. (2012).

98 The median values of selected metabolites and their ratios were compared among the healthy  
99 population, patients with latent tuberculosis, and patients with active tuberculosis using  
100 Kruskal-Wallis tests. Note that the figure representing Glu/Gln is on a logarithmic scale (C),  
101 while the others are on a linear scale. The levels represent relative abundances of over 400  
102 small compounds obtained by mass spectrometry. Although sulfoxy methionine was not  
103 measured in the study, figure (D) and (F) were drawn intentionally left blank for the ease of  
104 comparison with Figure 3.

105 Abbreviations: Glu, glutamate; Gln, glutamine; Met, methionine; MetSO, sulfoxy  
106 methionine; Asp, aspartate; Asn, asparagine; Kyn, kynurenine; Trp, tryptophan

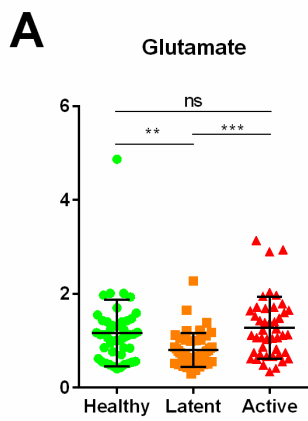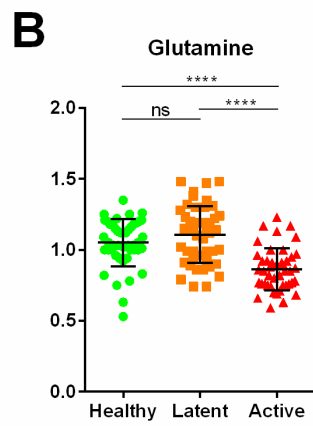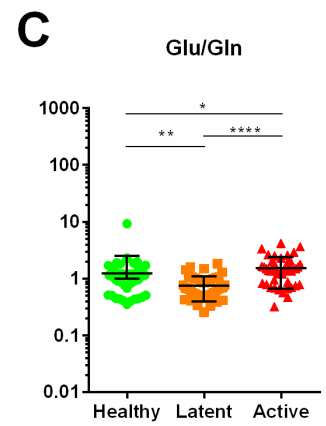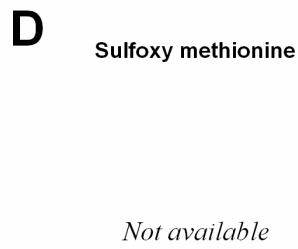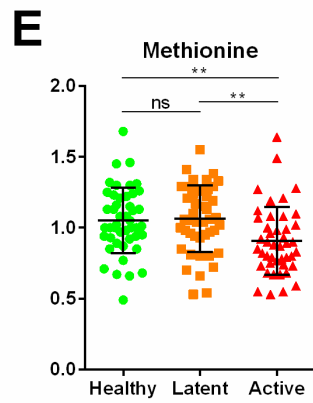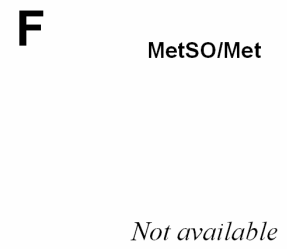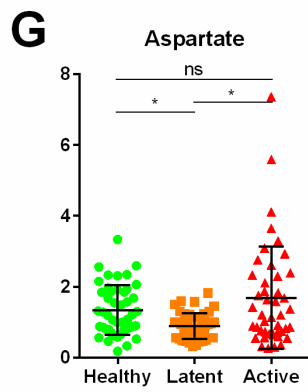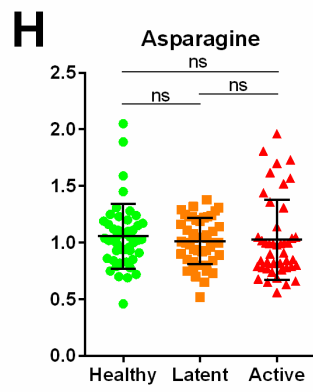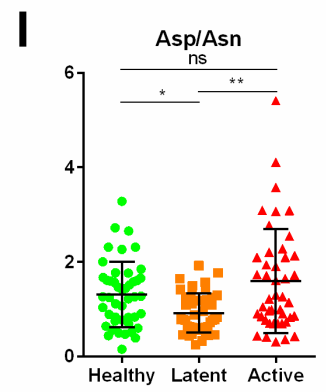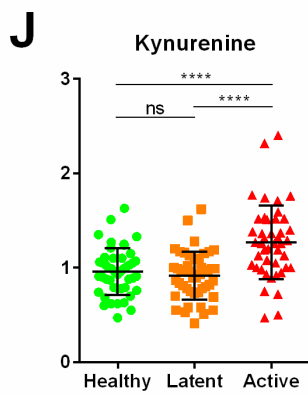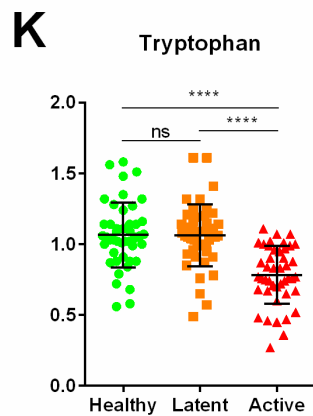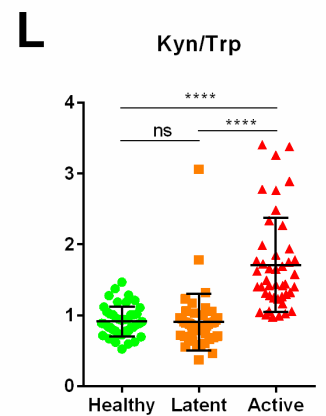

108 **Supplementary Figure S8.** ROC curves of the selected metabolites and their ratios for the  
109 differentiation of patients with active tuberculosis from those in the other groups, including  
110 patients with latent tuberculosis infection and healthy controls, from the study population by  
111 Weiner et al (2012).

112 Blue lines indicate ROC curves, and royal blue regions show the 95% CI of the curve computed  
113 with 2000 bootstrap replicates. The AUC, followed by its 95% CI in brackets, were also  
114 denoted over the bottom side of each figure. For the metabolite or ratio with AUC value of 1,  
115 CI was not presented to avoid misunderstanding.

116 Abbreviations: TPR, true positive rate; FPR, false positive rate; Glu, glutamate; Gln, glutamine;  
117 Met, methionine; MetSO, sulfoxy methionine; Asp, aspartate; Asn, asparagine; Kyn,  
118 kynurenine; Trp, tryptophan; ROC, receiver operating characteristic; CI, confidence interval;  
119 AUC, area under the curve

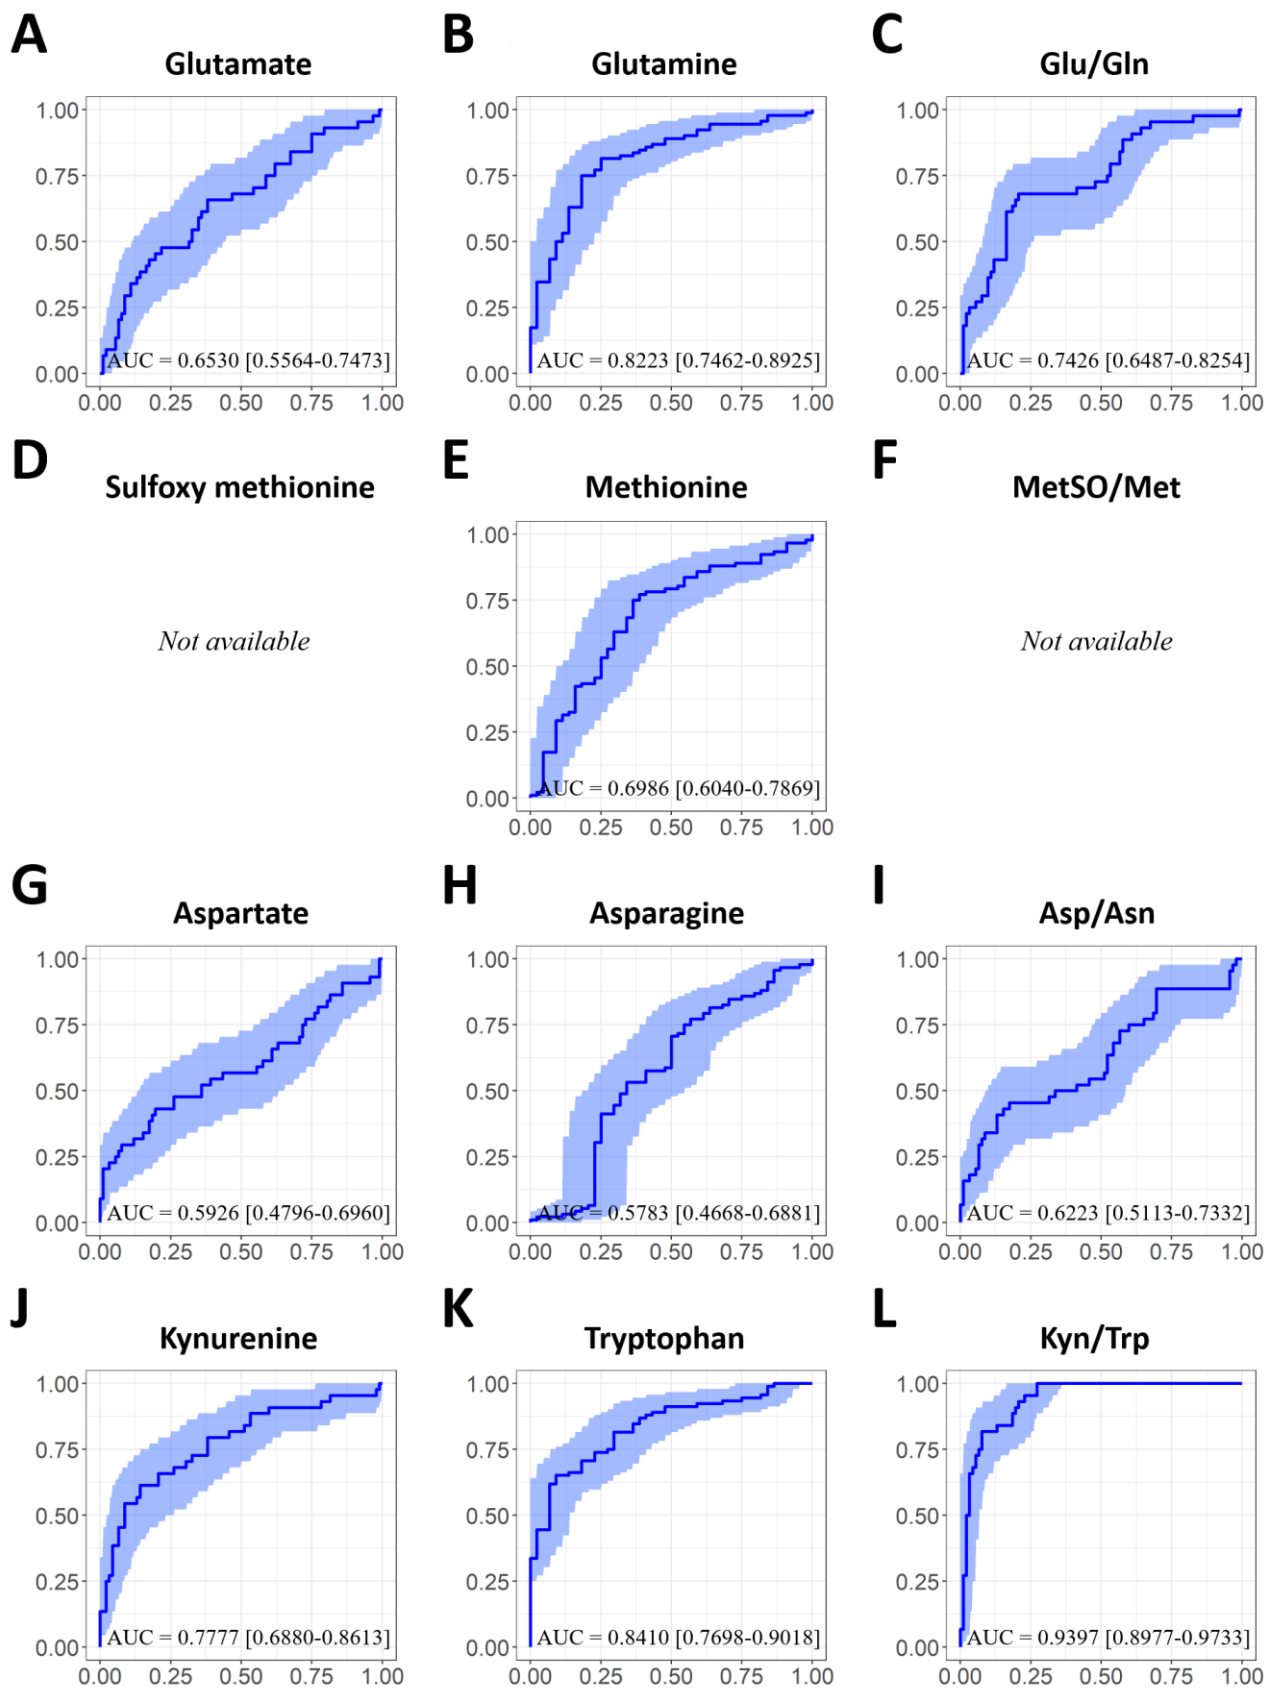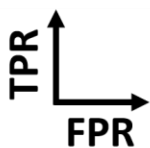

Supplement: 41598_2020_60669_MOESM1_ESM.pdf [file 41598_2020_60669_MOESM1_ESM.pdf]
